# Supplementary material for: Mutant analysis in the nonlegume Parasponia andersonii identifies NIN and NF‐YA1 transcription factors as a core genetic network in nitrogen‐fixing nodule symbioses
Source: PubMed Central journal article supplement (PMC7154530; doi:10.1111/nph.16386), 2020-01-30
Supplement: NPH-226-541-s001.pdf [file NPH-226-541-s001.pdf]

## ***New Phytologist* Supporting Information**

Article title:

**Mutant analysis in the non-legume *Parasponia andersonii* identifies NIN and NF-YA1 transcription factors as a core genetic network in nitrogen-fixing nodule symbioses**

Authors:

Fengjiao Bu, Luuk Rutten, Yuda Purwana Roswanjaya, Olga Kulikova, Marta Rodriguez-Franco, Thomas Ott, Ton Bisseling, Arjan van Zeijl & Rene Geurts

Article acceptance date: 4 December 2019

The following Supporting Information is available for this article:

**Fig. S1:** Spatiotemporal expression pattern of *PanNF-YA1<sub>pro</sub>:GUS* in *Parasponia andersonii* roots.

**Fig. S2:** Structure and expression of the *P. andersonii* *NIN* gene and the genotype of CRISPR-Cas9 *Pannin* mutants.

**Fig. S3:** *Rhizobium tropici* CIAT899.pMP604 constitutively expresses the LCO biosynthesis gene *nodC*.

**Fig. S4:** Structure of the *P. andersonii* *NF-YA1* gene and genotype of CRISPR-Cas9 *Panf-ya1* mutants.

**Fig. S5:** Lateral root formation is affected in the *P. andersonii* *nf-ya1* mutant.

**Fig. S6:** Phenotyping of *P. andersonii* *nf-ya1* knockout mutants.

**Fig. S7:** Phylogenetic analysis of NF-YA in the nitrogen-fixing clade.

**Fig. S8:** Expression of *PanNF-YA3* and *PanNF-YA6* in *P. andersonii* roots and nodules.

**Fig. S9:** Gene structure of *P. andersonii NF-YA3* and *NF-YA6*, genotype of CRISPR-Cas9 mutants, and nodulation phenotypes.

**Fig. S10:** Genotypes of *Pannf-ya1*, *Pannf-ya3* and *Pannf-ya6* CRISPR-Cas9 double and triple mutants.

**Fig. S11:** Nodulation efficiency and nodule size of *Parasponia andersonii nf-ya* single, double and triple knockout mutants.

**Fig. S12:** Nodule cytoarchitecture of *Parasponia andersonii nf-ya* double knockout mutants.

**Fig. S13:** Casparian strips in the vascular endodermis next to the nodule meristem in *Pannf-ya1*; *Pannf-ya3*; *Pannf-ya6* mutant plants.

**Fig. S14:** *Parasponia andersonii nf-ya1*, *nf-ya3*, *nf-ya6* and *Pannf-ya1*; *Pannf-ya3*; *Pannf-ya6* mutants can form arbuscular mycorrhiza.

**Fig. S15:** Putative NIN Binding sites in the *PanNF-YA1* promoter region.

**Table S1** Sequences of sgRNAs used for creating single, double and triple knockout mutants.

**Table S2** Primers used in this work.

**Table S3** Putative promoter sequences used for promoter-reporter GUS assays.

**Table S4** Gene identifiers for NF-YA proteins used to build the phylogenetic tree depicted in Figure 4 and Figure S7.

**Fig. S1: Spatiotemporal expression pattern of *PanNF-YAI*<sub>pro</sub>:GUS in *Parasponia andersonii* roots.**

(a-d) GUS-stained non-inoculated root segments. (e-g) GUS-stained inoculated root segments. (a) Faint *PanNF-YAI*<sub>pro</sub>:GUS activity was observed around the vasculature in the differentiated zone of a young root. (b) *PanNF-YAI*<sub>pro</sub>:GUS activity observed in the pericycle cells (70  $\mu$ m-thick longitudinal root section). (c) *PanNF-YAI*<sub>pro</sub>:GUS activity observed in pericycle cells opposite protoxylem poles (70  $\mu$ m-thick cross-section of the root). (d) Spatiotemporal expression of *PanNF-YAI*<sub>pro</sub>:GUS during lateral root initiation (70  $\mu$ m-thick longitudinal root-section). (e, f) *PanNF-YAI*<sub>pro</sub>:GUS activity was induced in epidermal cells at the elongation and differentiation zone of a root at 2 dpi with *M. plurifarium* strain BOR2. (g) *PanNF-YAI*<sub>pro</sub>:GUS activity detected in the root epidermis upon rhizobium inoculation at a similar developing stage as shown in Figure 1A. Plants were grown *in vitro* (a-f), or in a perlite potting system (g). Data shown are obtained using transgenic *PanNF-YAI*<sub>pro</sub>:GUS line 1E5. ep: epidermis; pc: pericycle; px: protoxylem; arrowhead indicates lateral root primordia.

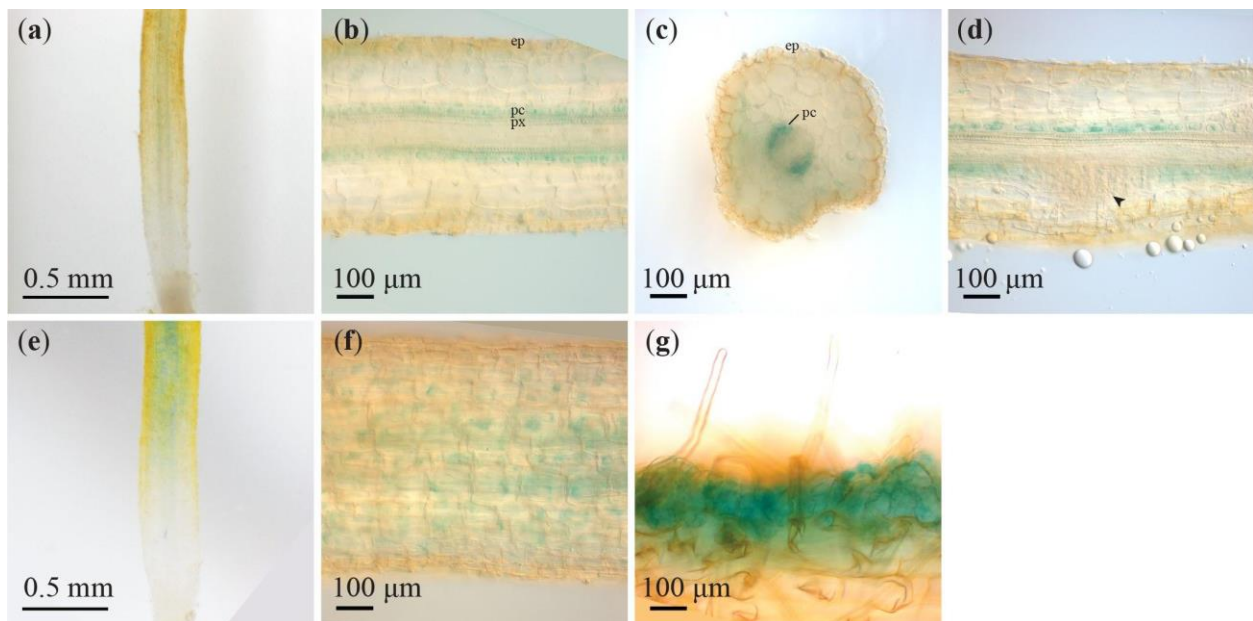

**Fig. S2: Structure and expression of the *P. andersonii* *NIN* gene and the genotype of CRISPR-Cas9 *Pannin* mutants..**

(a) Schematic representation of the *PanNIN* gene model. Indicated are two *PanNIN* transcripts: *PanNIN.1* and *PanNIN.2*. Translational initiation (ATG) and termination (STOP) sites are indicated by arrows. (b) Expression of *PanNIN.1* and *PanNIN.2* in roots and nodules. Expression was determined by quantification of RNAseq reads. Data represent DE-seq2-normalized read counts ( $n = 3$ )  $\pm$  SD, which were obtained from van Velzen et al., 2018. Different letters indicate statistical significance (Student's t-test,  $p < 0.05$ ). (c) Schematic representation of the *PanNIN* gene model. Indicated are the locations of 3 sgRNA target sites (red triangles) and the translational initiation sites present in *PanNIN.1* and *PanNIN.2*. Note that the sgRNAs target the first coding-exon that is specific for *PanNIN.1*. (d) Alignment of the sequence of the first *PanNIN* coding-exon in wild type and *Pannin* mutant lines B1 and B3. sgRNA target sites are marked in blue, PAM sequences are marked in red. Note that in both lines mutations are homozygous.

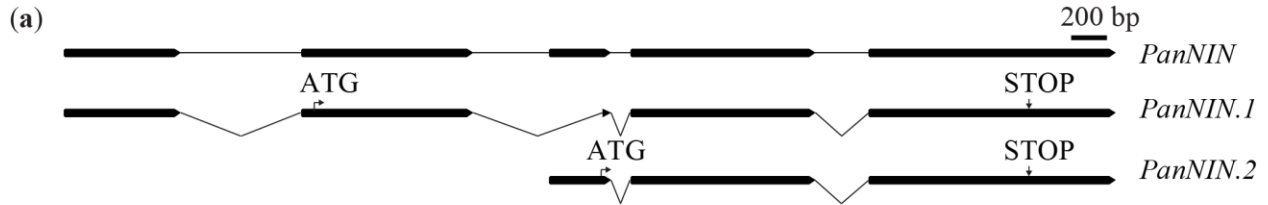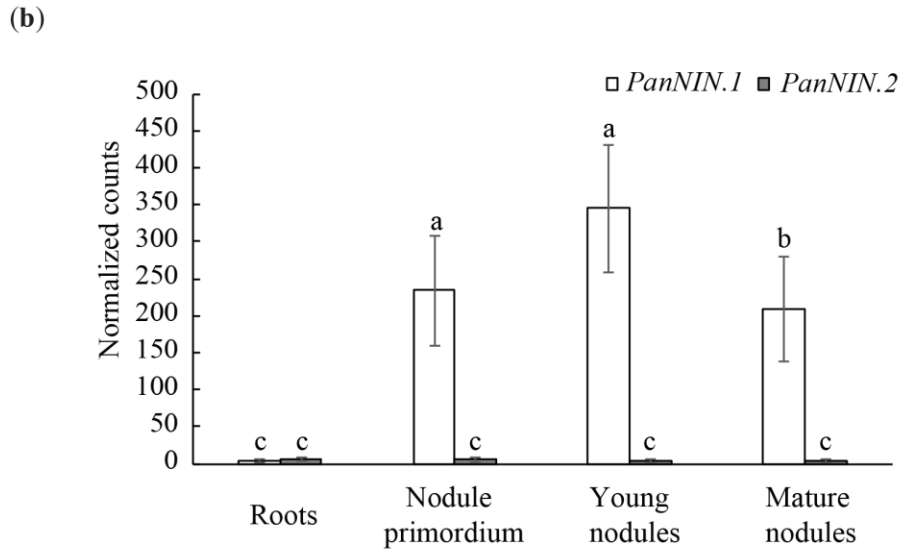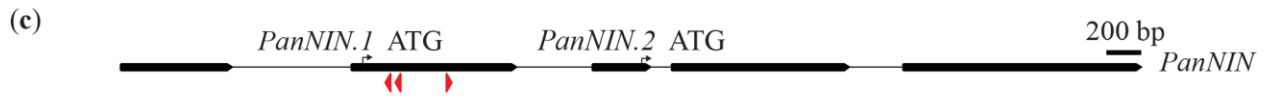

(d)

```

PanNIN WT ATGGAATACGGTGCATGATGCCAAGCAATGCGTATGGAAATCCCTCTCTGACGCCACCAATGGAAGTAGATTTTCATGGACCACTTCTCTAGAGGGTTGTTGGGACCCGCACTGGCCGGCTGGG
Panmin.1 B1 ATGGAATACGGTGCATGATGCCAAGCAATGCGTATGGAAATCCCTCTCTGACGCCACCAATGGAAGTAGATTTTCATGGACCACTTCTCTAGAGGGTTGTTGGGACCCGCACTGGCCGGCTGGG
Panmin.1 B3 ATGGAATACGGTGCATGATGCCAAGCAATGCGTATGGAAATCCCTCTCTGACGCCACCAATGGAAGTAGATTTTCATGGACCACTTCTCTAGAGGGTTGTTGGGACCCGCACTGGCCGGCTGGG
PanNIN WT ACCGGACTCAACTTCACGCAACCTGCAGCCCGTCTCTCTGCTCCGGG--ACTCATGGAACATCGCAATACATGCTTCTGTTGAGTCTTCAAAACACATCCACCGCTC
Panmin.1 B1 ACCGGACTCAACTTCACGCAACCTGCAGCCCGTCTCTCTGCTCCGGG--ACTCATGGAACATCGCAATACATGCTTCTGTTGAGTCTTCAAAACACATCCACCGCTC
Panmin.1 B3 ACCGGACTCAACTTCACGCAACCTGCAGCCCGTCTCTCTGCTCCGGG--ACTCATGGAACATCGCAATACATGCTTCTGTTGAGTCTTCAAAACACATCCACCGCTC
PanNIN WT CATGATCAAAATCATCAAGATCATCAAGAACAGAAAGAGGAGGTAGTGATGATGTTCAAGAGAACGACTCATCCGAGAGCAACATAACAATCTTTCATGAATGAAGCAAATGAAGTAGGGAAGGGA
Panmin.1 B1 CATGATCAAAATCATCAAGATCATCAAGAACAGAAAGAGGAGGTAGTGATGATGTTCAAGAGAACGACTCATCCGAGAGCAACATAACAATCTTTCATGAATGAAGCAAATGAAGTAGGGAAGGGA
Panmin.1 B3 CATGATCAAAATCATCAAGATCATCAAGAACAGAAAGAGGAGGTAGTGATGATGTTCAAGAGAACGACTCATCCGAGAGCAACATAACAATCTTTCATGAATGAAGCAAATGAAGTAGGGAAGGGA
PanNIN WT CTGTGGATTTGGCCAAAGCAAAACCTGGAAGAGGGCATGTTTCATCAGTGAAAGAAAGGCTAAGCACTGGCAATGACTACTTGAAGAAATGTACAGAGATAGAGATGACTTATCCAAATATGGGTTG
Panmin.1 B1 CTGTGGATTTGGCCAAAGCAAAACCTGGAAGAGGGCATGTTTCATCAGTGAAAGAAAGGCTAAGCACTGGCAATGACTACTTGAAGAAATGTACAGAGATAGAGATGACTTATCCAAATATGGGTTG
Panmin.1 B3 CTGTGGATTTGGCCAAAGCAAAACCTGGAAGAGGGCATGTTTCATCAGTGAAAGAAAGGCTAAGCACTGGCAATGACTACTTGAAGAAATGTACAGAGATAGAGATGACTTATCCAAATATGGGTTG
PanNIN WT CCCATTAGGAAGAGGAGGAGGCAGATATTGACCACCTATGACCAGCCCTTATTGACTGGATCCAAACTGTAAGTCTCTGGCCAGTTATAGAATGATCGAGGGAATATCAGTTCTTGTGTGAGGAGGAC
Panmin.1 B1 -----GAAGAGGAGGAGGCAGATATTGACCACCTATGACCAGCCCTTATTGACTGGATCCAAACTGTAAGTCTCTGGCCAGTTATAGAATGATCGAGGGAATATCAGTTCTTGTGTGAGGAGGAC
Panmin.1 B3 -----AAGAGGAGGAGGCAGATATTGACCACCTATGACCAGCCCTTATTGACTGGATCCAAACTGTAAGTCTCTGGCCAGTTATAGAATGATCGAGGGAATATCAGTTCTTGTGTGAGGAGGAC
PanNIN WT TCGGCTGAGTCAGTTGGGTTGCCGAGTCAGGCCCTCTTAGGGAAGTTGCCAGAGTGGACCCCAAGATGTTCTGTTACTTTAGGAGCTACGAGTACCCACGTATTAACATGCTAAGCAGTACAATGTTGCT
Panmin.1 B1 TCGGCTGAGTCAGTTGGGTTGCCGAGTCAGGCCCTCTTAGGGAAGTTGCCAGAGTGGACCCCAAGATGTTCTGTTACTTTAGGAGCTACGAGTACCCACGTATTAACATGCTAAGCAGTACAATGTTGCT
Panmin.1 B3 TCGGCTGAGTCAGTTGGGTTGCCGAGTCAGGCCCTCTTAGGGAAGTTGCCAGAGTGGACCCCAAGATGTTCTGTTACTTTAGGAGCTACGAGTACCCACGTATTAACATGCTAAGCAGTACAATGTTGCT
PanNIN WT GGGTCACTGGCCCTTCCATTTTTGAGCSTGGGAATGGGACTTGTGTTGGGTGTTGTTGAGATGTTGATGACTACTCAAAGGTCAACTACCCGCTCCGAAATGAAATGTTCTGCCAAGCCGTTGAG
Panmin.1 B1 GGGTCACTGGCCCTTCCATTTTTGAGCSTGGGAATGGGACTTGTGTTGGGTGTTGTTGAGATGTTGATGACTACTCAAAGGTCAACTACCCGCTCCGAAATGAAATGTTCTGCCAAGCCGTTGAG
Panmin.1 B3 GGGTCACTGGCCCTTCCATTTTTGAGCSTGGGAATGGGACTTGTGTTGGGTGTTGTTGAGATGTTGATGACTACTCAAAGGTCAACTACCCGCTCCGAAATGAAATGTTCTGCCAAGCCGTTGAG

```

**Fig. S3: *Rhizobium tropici* CIAT899.pMP604 constitutively expresses the LCO biosynthesis gene *nodC*.**

The pMP604 plasmid encodes an autoactive variant of *nodD*, a transcription factor that regulates LCO biosynthesis genes. Shown are the relative expression of *nodC* in wild-type *R. tropici* CIAT899 (white dots) and *R. tropici* strain CIAT899 transformed with pMP604 (black dots) in the absence or presence of increasing concentrations of naringenin (nM). Dots represent technical repeats.

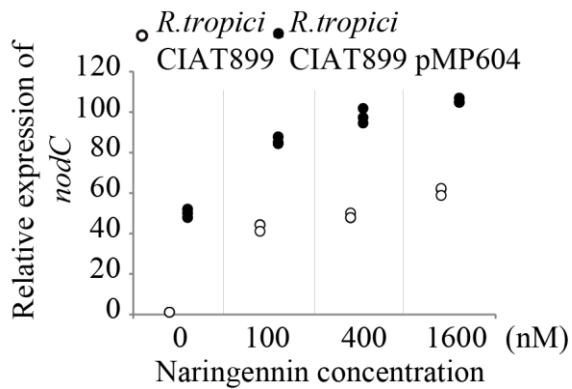

**Fig. S4: Structure of the *P. andersonii* *NF-YA1* gene and genotype of CRISPR-Cas9 *Panf-ya1* mutants.**

(a) Schematic representation of the *PanfNF-YA1* gene model. Indicated are the locations of 3 sgRNAs used for mutagenesis (red triangles). (b) Genotype of the bi-allelic *Pannf-ya1-1* mutant line. (c) Schematic representation of the *PanfNF-YA1* gene model. Indicated (red triangles) are the location of sgRNA used in an independent transformation to creating *Pannf-ya1* CRISPR-Cas9 mutants. (d) The genotype of the *Pannf-ya1* mutant lines m3 and m5. Shown is the sequence of the first coding exon.

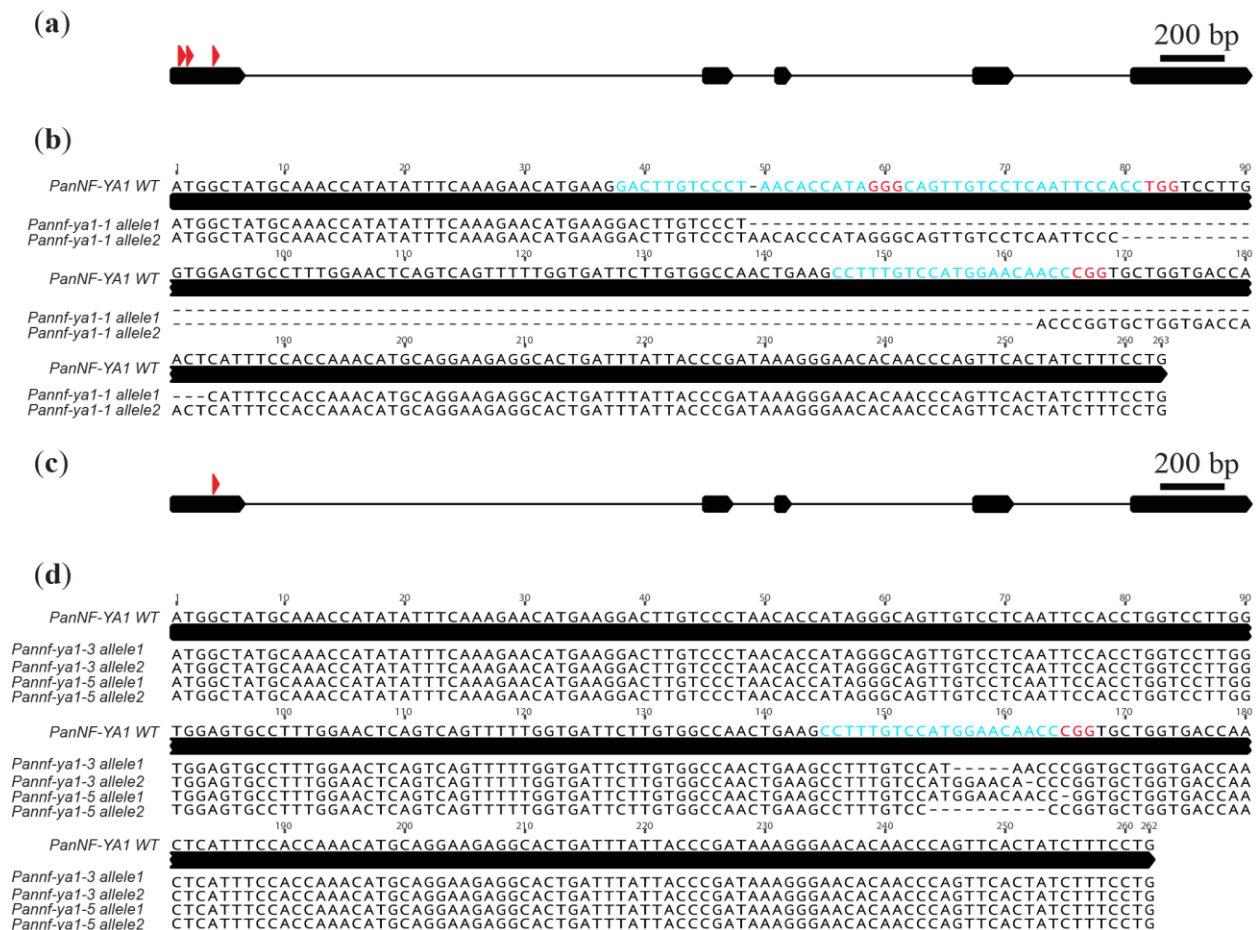

**Fig. S5 Lateral root formation is affected in the *P. andersonii nf-ya1* mutant.**

(a) Number of roots formed on plantlets incubated on rooting medium for 14 days is lower in *Pannf-ya1-1* mutants (n=67 for EV-control n=66 for *Pannf-ya1-1*). Statistical significance based on a student's T-test  $p < 0.05$ . (b-d) Plantlets in a comparable developmental stage were selected to be used for the root formation assay, transferred to EKM-agar plates lined with cellophane and scored after 20 days. EV-control n=12, *Pannf-ya1-1* n=12. (b) Number of growing main roots on EKM medium is not different between EV-control and *Pannf-ya1-1*. Main roots are characterized as all roots directly attached to the shoot. Given the nature of rooted plantlets there are usually multiple roots. (c) Total summed main root length per shoot is not different between EV-control and *Pannf-ya1-1*. (d) Number of lateral roots formed on main roots is reduced in *Pannf-ya1-1* mutants. Statistical significance for (b,c,d) based on Mann Whitney U-test  $p < 0.05$ . (e) Representative examples of EV-control plantlets grown 20 days on EKM-agar plates. (f) Representative examples of *Pannf-ya1-1* plantlets grown for 20 days on EKM-agar plates.



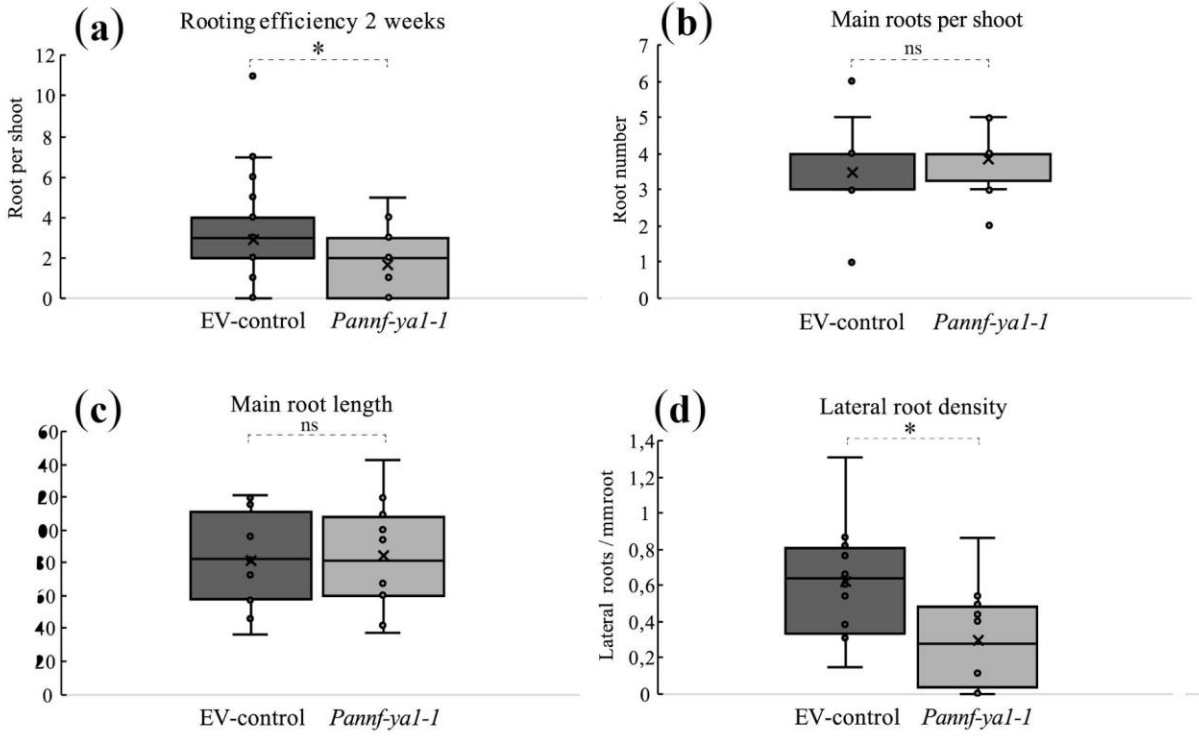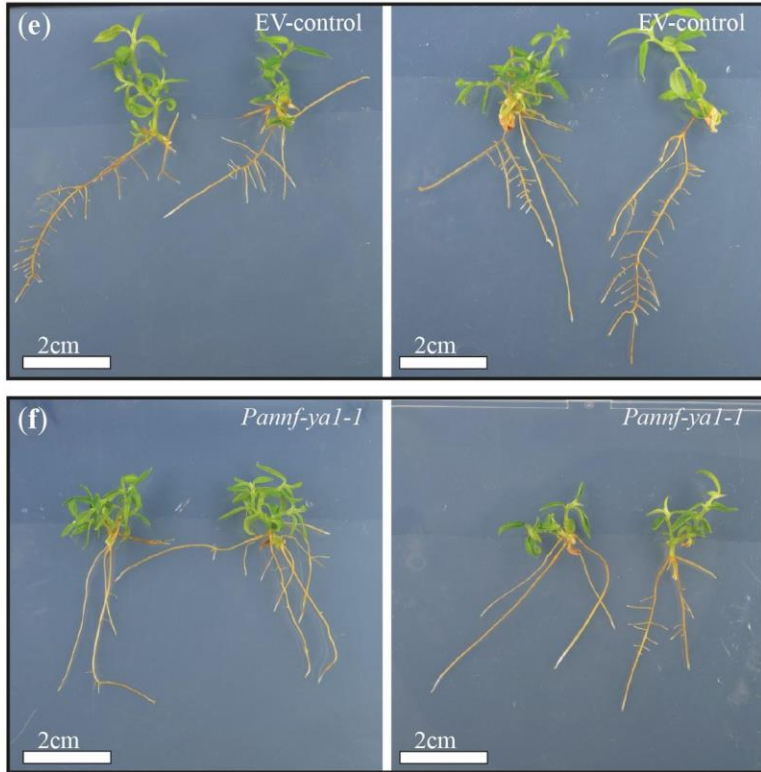

**Fig. S6: Phenotyping of *P. andersonii* *nf-ya1* knockout mutants.**

(a) Average number of nodules formed on wild type (WT), transgenic control line CTR44, and the CRISPR-Cas9 knockout mutant *Pannf-ya1* (line *Pannf-ya1-1*), 5.5 weeks post-inoculation with *M. plurifarium* BOR2. Different letters indicate statistical significance (Student's t-test,  $p < 0.05$ ). (b) Nitrogenase activity measured by an acetylene reduction assay (ARA) on nodules formed on transgenic control line CTR44 and *Pannf-ya1* (*Pannf-ya1-1*). Data represent means ( $n = 15$  in panel a,  $n = 5$  in panel b)  $\pm$  SD. nd.: not detected. (c) Cytoarchitecture of nodules formed on *Pannf-ya1-3* and (d) *Pannf-ya1-5*, 4 weeks post inoculation with *M. plurifarium* BOR2. v: nodule vasculature; ac: apoplastic colonies of rhizobia.

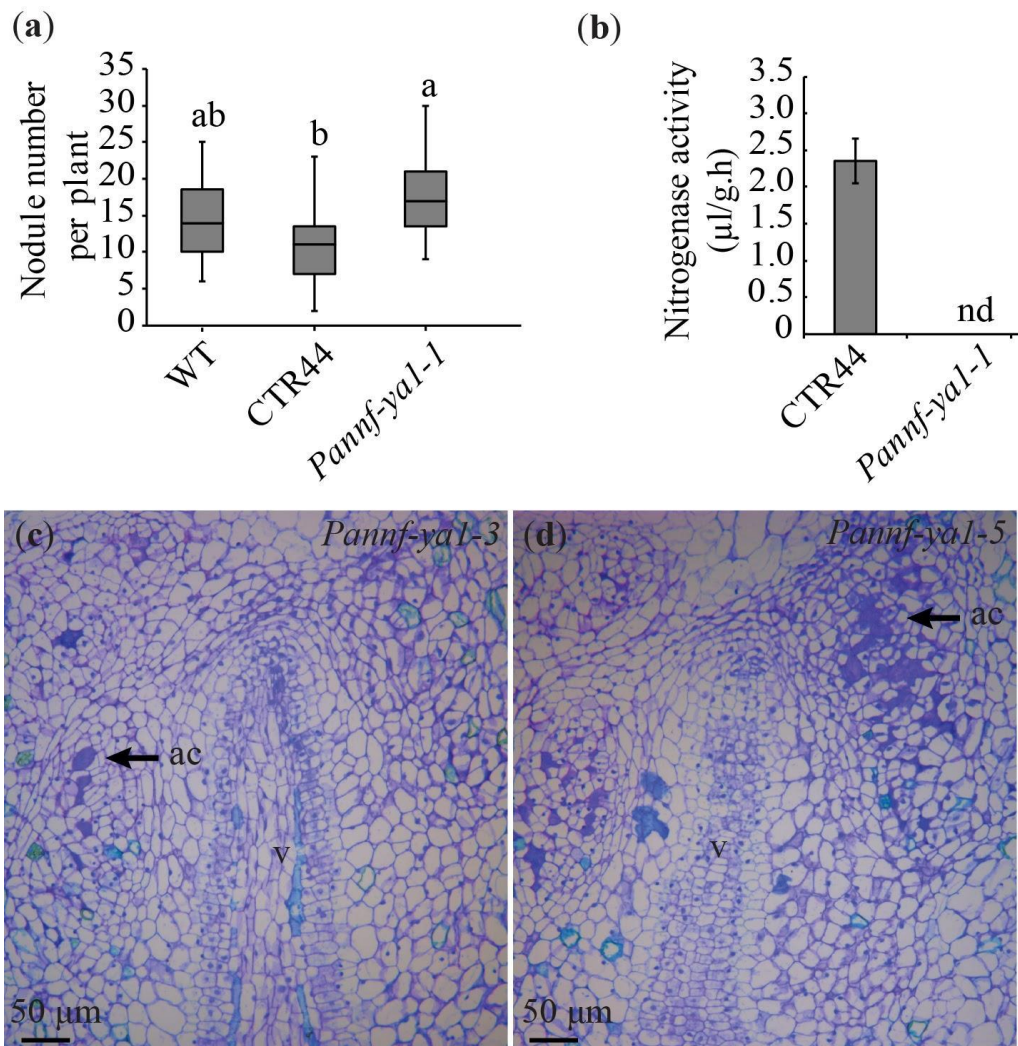

**Fig. S7: Phylogenetic analysis of NF-YA in the nitrogen-fixing clade.**

Bayesian phylogeny of NF-YA proteins reconstructed based on an alignment of protein sequences from the following species: *Parasponia andersonii* (Pan), *Trema orientalis* (Tor), *Arabidopsis thaliana* (At), *Medicago truncatula* (Mt), *Lotus japonicus* (Lj), *Glycine max* (Glyma), *Arachis duranensis* (Adu), *Phaseolus vulgaris* (Pv), *Casuarina glauca* (Cgl), *Datisca glomerata* (Dgl), *Morus notabilis* (Mno), *Prunus persica* (Ppe), and *Fragaria vesca* (Fve). *P. andersonii* NF-YA proteins are marked in red. Red pentagrams mark duplication events within the legume family. Orthogroups are indicated by coloured circles. Node labels indicate posterior probability, Node labels with a value above 0.9 are not shown.

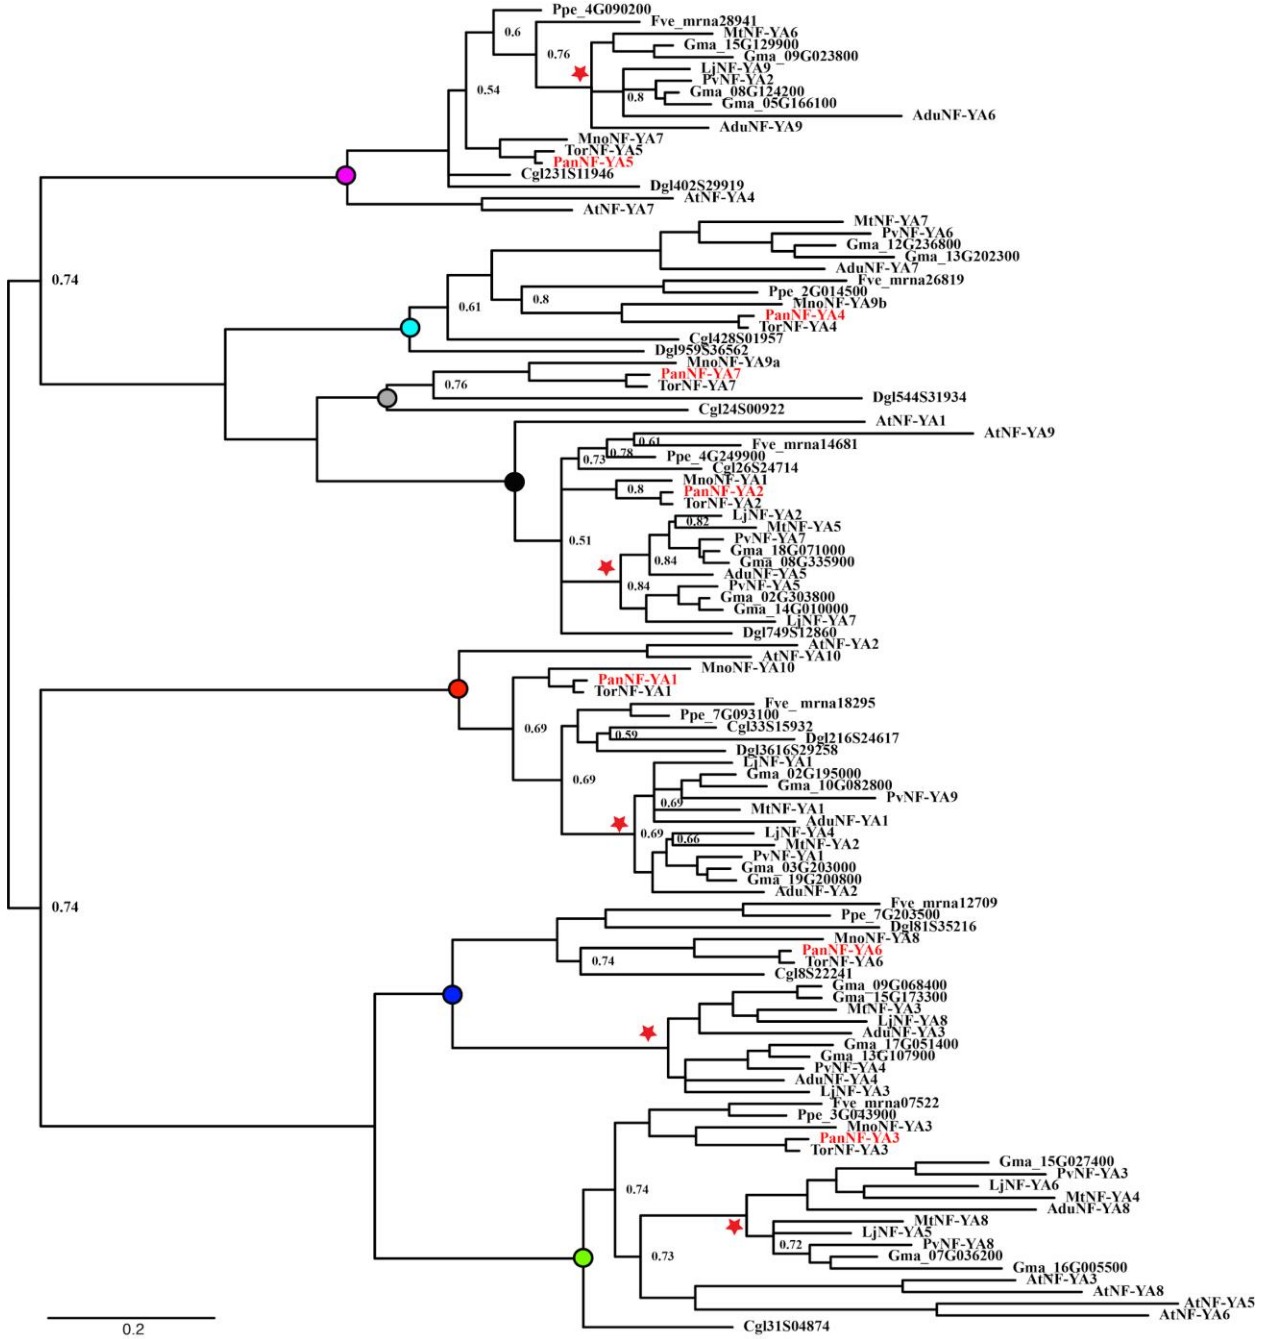

**Fig. S8: Expression of *PanNF-YA3* and *PanNF-YA6* in *P. andersonii* roots and nodules.**

(a) Expression of *PanNF-YA3*<sub>pro</sub>:GUS in uninoculated roots. (b-d) Expression of *PanNF-YA3*<sub>pro</sub>:GUS following inoculation with *M. plurifarium* strain BOR2. (e, f) *PanNF-YA6*<sub>pro</sub>:GUS in uninoculated roots (e) and following inoculation with *M. plurifarium* strain BOR2 (f). (a) *PanNF-YA3*<sub>pro</sub>:GUS is expressed in the root meristem, (b, c) in discrete spots along the root (d) and in mature nodules. (e) *PanNF-YA6*<sub>pro</sub>:GUS is expressed at the root meristem and root vasculature, and (f) the tip of the nodule. (g) Relative expression of *PanNF-YA3* and (h) *PanNF-YA6* in non-inoculated and *R. tropici* CIAT899.pMP604 inoculated (1 DPI) transgenic control (CTR44) and *Pannin* mutant (line B3) roots detected by qRT-PCR. Data were generated from the RNA samples used in Figure 2. RNA was isolated from root segments encompassing the elongation and part of the differentiation zone at 1 DPI with *R. tropici* CIAT899.pMP604. Data represent means of 2 independent experiments with a total of 5 biological replicates each  $\pm$  SE. Data were normalized against the mock-treated CTR44 sample. np: nodule primordium; nodule: mature nodule.

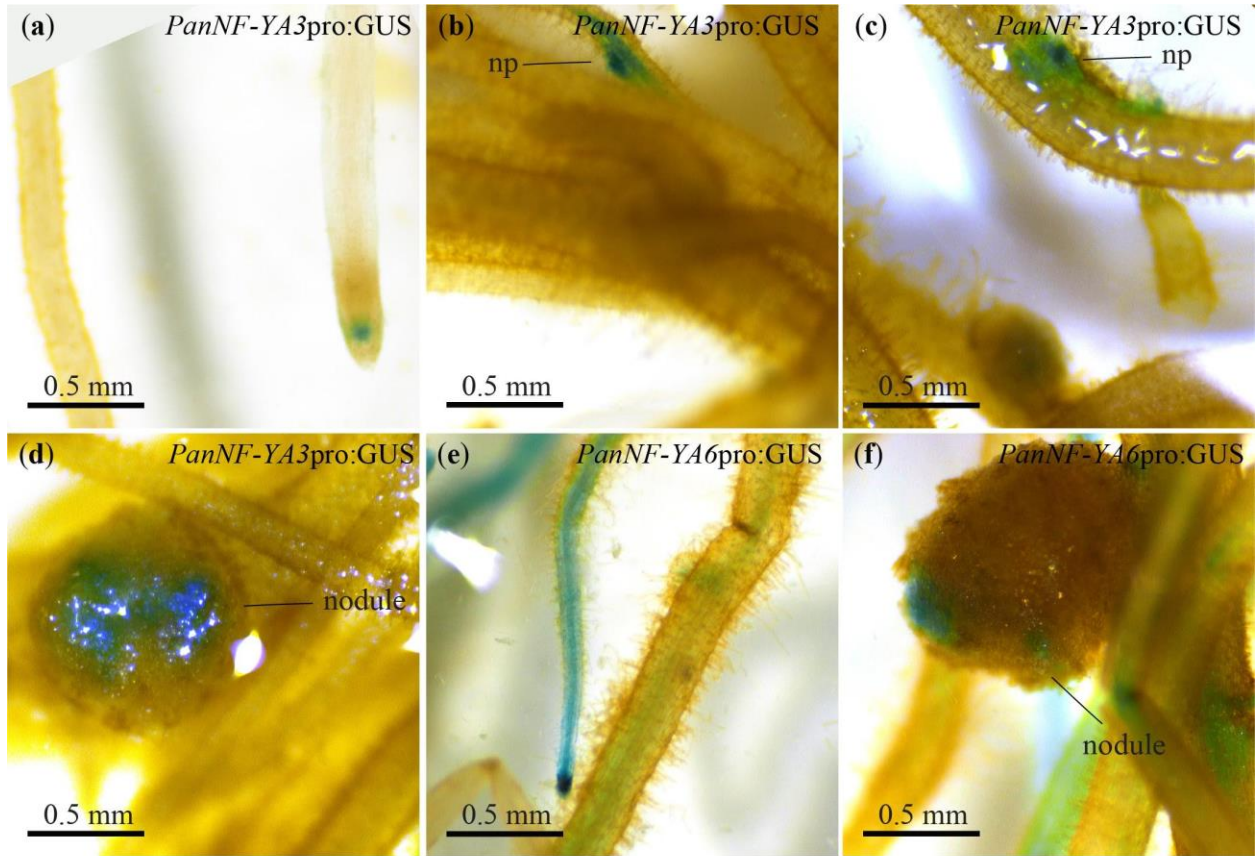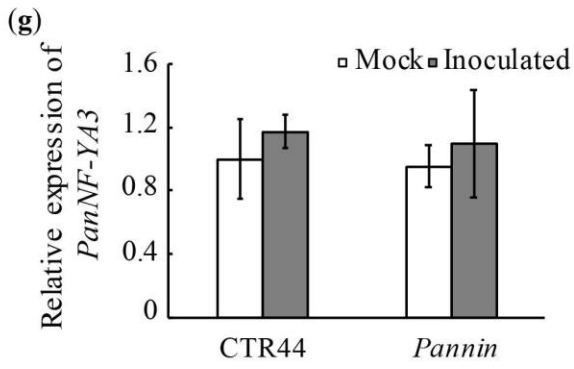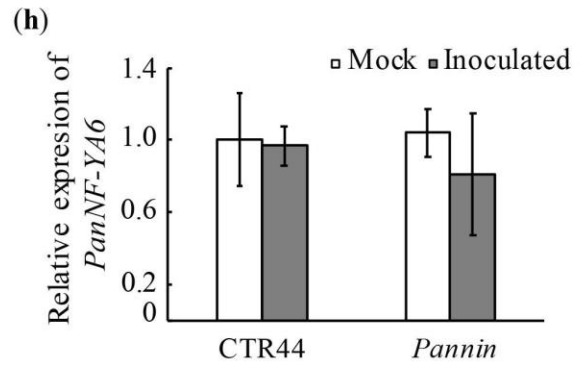

**Fig. S9: Gene structure of *P. andersonii* NF-YA3 and NF-YA6, genotype of CRISPR-Cas9 mutants, and nodulation phenotypes.**

(a) Schematic representation of the *PanNF-YA3* gene model. Indicated are the positions of 3 sgRNAs used for mutagenesis (red triangles). (b) The genotype of the *Pannf-ya3* mutant lines 11 and 16. Shown is the sequence of the first coding exon. (c) Schematic representation of the *PanNF-YA6* gene model. Indicated are the positions of 3 sgRNAs used for mutagenesis (red triangles). (d) The genotype of 4 *Pannf-ya6* mutant lines. Shown is the sequence of the second coding exon. (e) Averaged number of nodules formed on wild type (WT), transgenic control line CTR44, and the *Pannf-ya3* (line 11) and *Pannf-ya6* (line 3) CRISPR-Cas9 knockout mutants at 5.5 weeks post-inoculation with *M. plurifarium* BOR2. (f) Nitrogenase activity measured by an acetylene reduction assay (ARA) on nodules formed on transgenic control line CTR44 and *Pannf-ya3* (line 11) and *Pannf-ya6* (line 3). Data represent means ( $n = 15$  in E,  $n = 5$  in F)  $\pm$  SD. (g, h) Cytoarchitecture of *Pannf-ya3* (line 11) (g) and *Pannf-ya6* (line 3) (h) mutant nodules induced by *M. plurifarium* BOR2 (4 weeks post-inoculation). In both cases, nodules are indistinguishable from wild-type. sgRNAs are marked in blue, PAM sequences in red. m: nodule meristem; in: infection zone; fix: fixation zone; v indicates nodule vasculature. Scale bars are equal to 50  $\mu$ m.

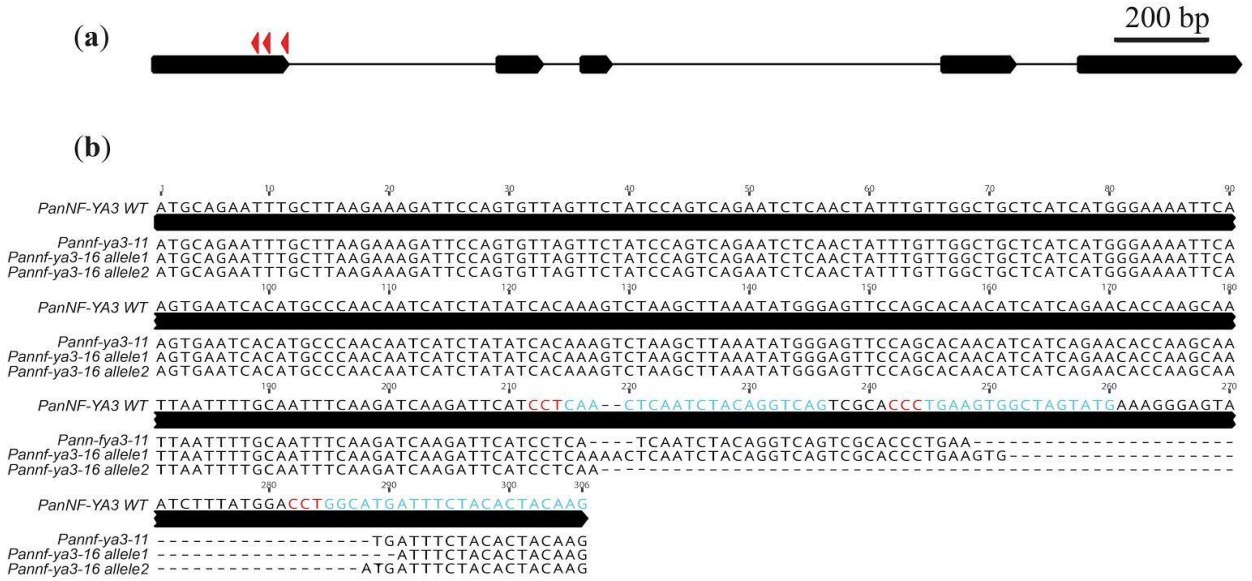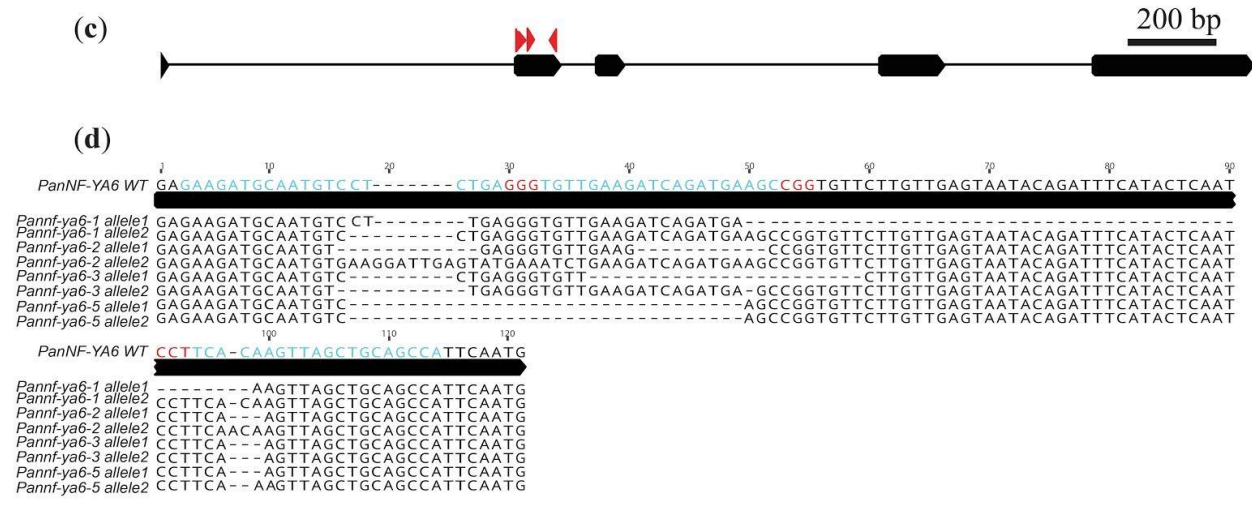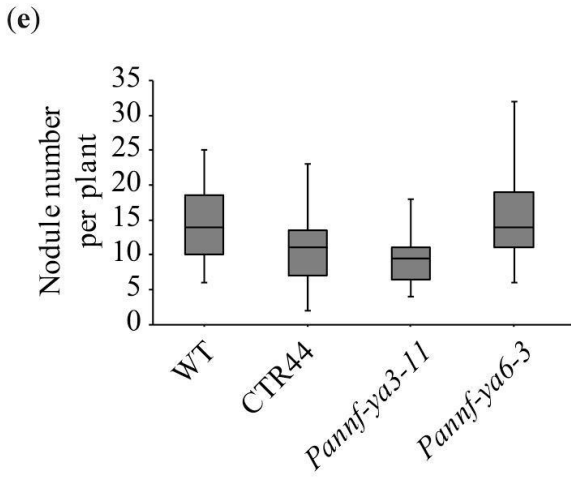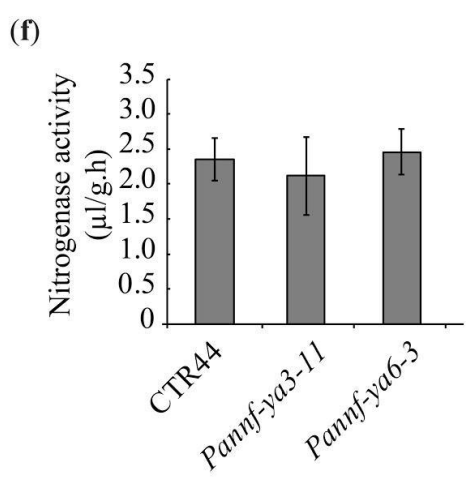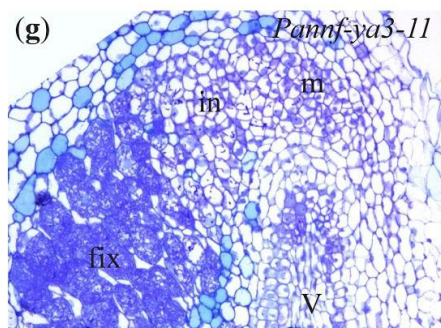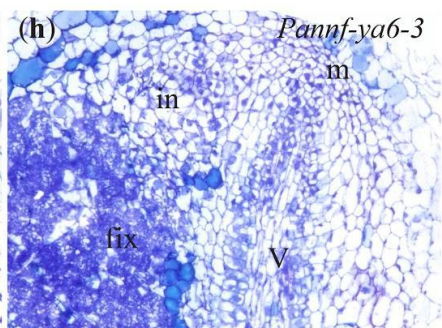



**Fig. S10: Genotypes of *Pannf-ya1*, *Pannf-ya3* and *Pannf-ya6* CRISPR-Cas9 double and triple mutants.**

(a) Schematic representation and (b) genotype of *PanNF-YA1* for double knockout mutant *Pannf-ya1;Pannf-ya3* (line m1), *Pannf-ya1;Pannf-ya6* (line m6) and *Pannf-ya1;Pannf-ya3;Pannf-ya6* triple mutants (line m7, m8 and m11). (c) Schematic representation and (d) genotype of *PanNF-YA3* for double and triple knockout mutants. Notice that a different number of sgRNAs targeting *PanNF-YA3* were used to create double mutants (2 sgRNAs; DM) and triple mutants (1 sgRNA; TM). (e) Schematic representation and (f) genotype of *PanNF-YA6* for double and triple knockout mutants. Red triangles indicate the positions of sgRNAs used for mutagenesis. Shown in b and d are the sequences of the first coding exons, shown in f is the second coding exon. sgRNAs target sites are marked in blue, PAM sequences in red.



**Fig. S11: Nodulation efficiency and nodule size of *Parasponia andersonii nf-ya1* single, double and triple knockout mutants.**

(a) Average nodule number per 100 mg root fresh weight, formed on transgenic control line CTR44, and CRISPR-Cas9 knockout mutants *Pannf-ya1* (line *Pannf-ya1-1*), *Pannnf-ya1;Pannf-ya3* (line 1), *Pannf-ya1;Pannf-ya6* (line 6), *Pannf-ya3;Pannf-ya6* (line 5) and the *Pannf-ya1;Pannf-ya3;Pannf-ya6* triple mutant (line 11), 5.5 weeks post-inoculation with *M. plurifarium* BOR2. (b) Nodule size presents averaged nodule size measured by nodule area (2D). In the case of the *Pannf-ya1;Pannf-ya3;Pannf-ya6* triple mutant, only nodule structures as shown in Figure 6B were included in this analysis. Data represent means (n = 4-5 plants)  $\pm$  SE. Different letters indicate statistical significance (Student's t-test,  $p < 0.05$ ).

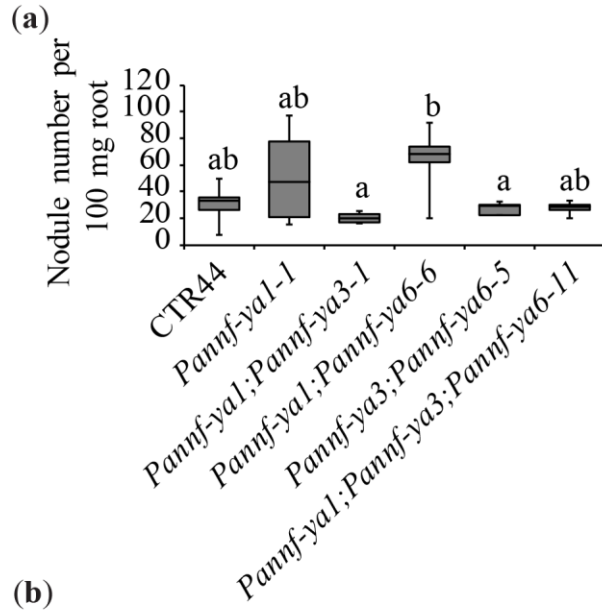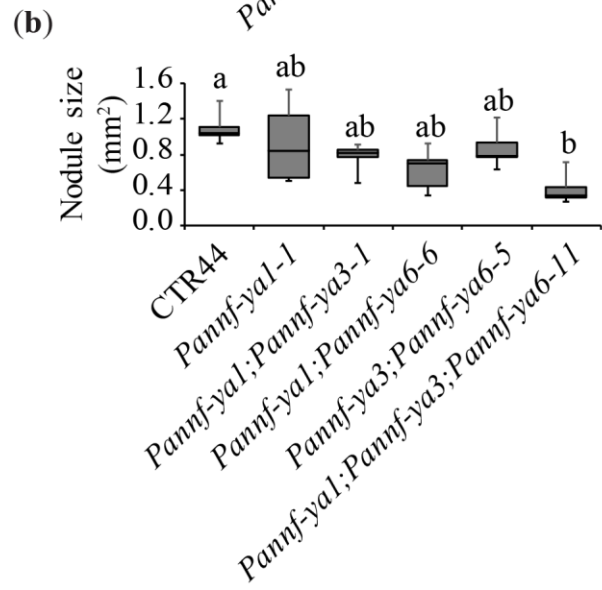

**Fig. S12: Nodule cytoarchitecture of *Parasponia andersonii* *nf-ya* double knockout mutants.**

(a, d) Sections of nodules formed at 5.5 weeks post-inoculation on *Pannf-ya1;Pannf-ya3-1*, (b, e) *Pannf-ya1;Pannf-ya6-6* and (c, f) *Pannf-ya3;Pannf-ya6-5* mutant plants. (d, e) A zoom-in of nodule shown in a and b to visualize the absence of rhizobium intracellular infection threads. (f) A zoom-in of the nodule shown in c to visualize normal rhizobium intracellular infection. in: infection zone; fix: fixation zone; v: nodule vasculature; it: intracellular infection thread; ic: infected cells; nc: non-infected cells; ac: apoplastic colonies of rhizobia.

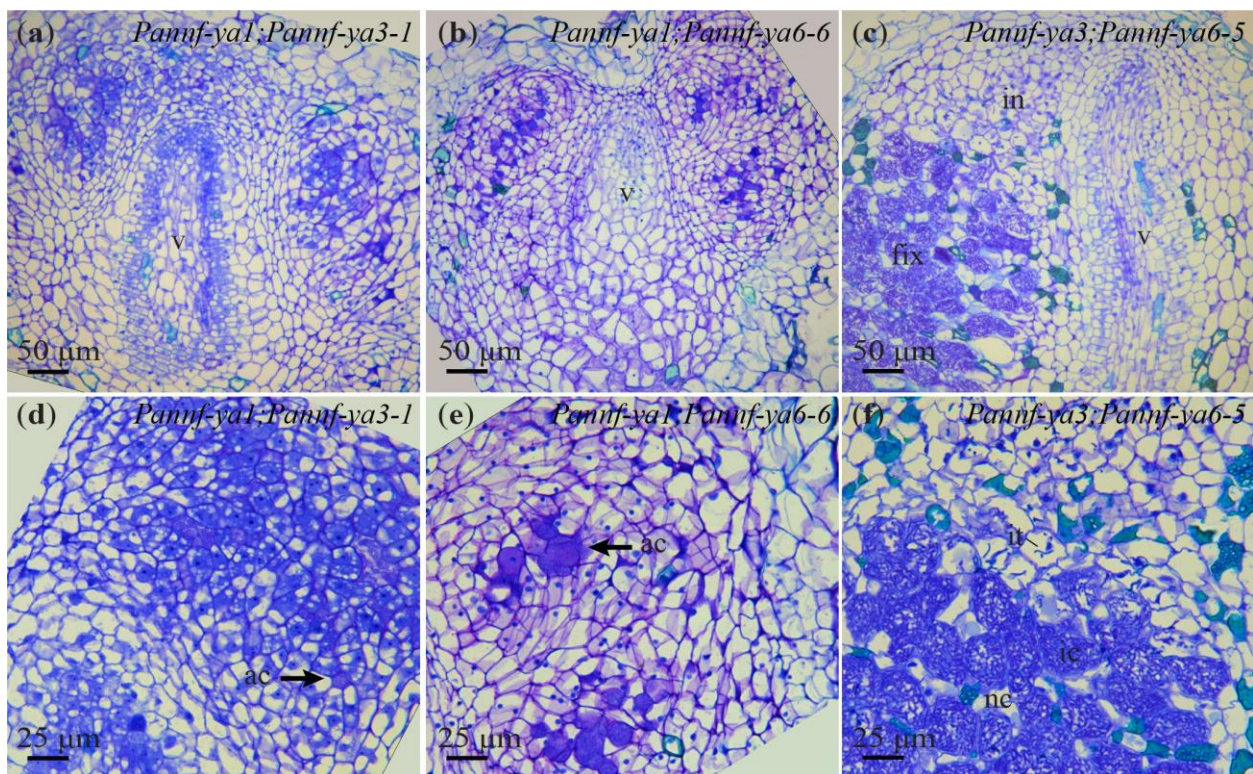

**Fig. S13: Casparian strips in the vascular endodermis next to the nodule meristem in *Pannf-ya1;Pannf-ya3;Pannf-ya6* mutant.**

(a, b) Visualization of Casparian strips in nodule sections of transgenic control (CRT44) (a) and *Pannf-ya1;Pannf-ya3;Pannf-ya6* triple mutant plants (b). Note that casparian strips (white arrows) are not present in the nodule vascular tip in control (a), but present in the vascular tip of the mutant nodule (b). Casparian strips are detected as auto-fluorescence under UV light. v: nodule vasculature. n = 5 nodules per lines.

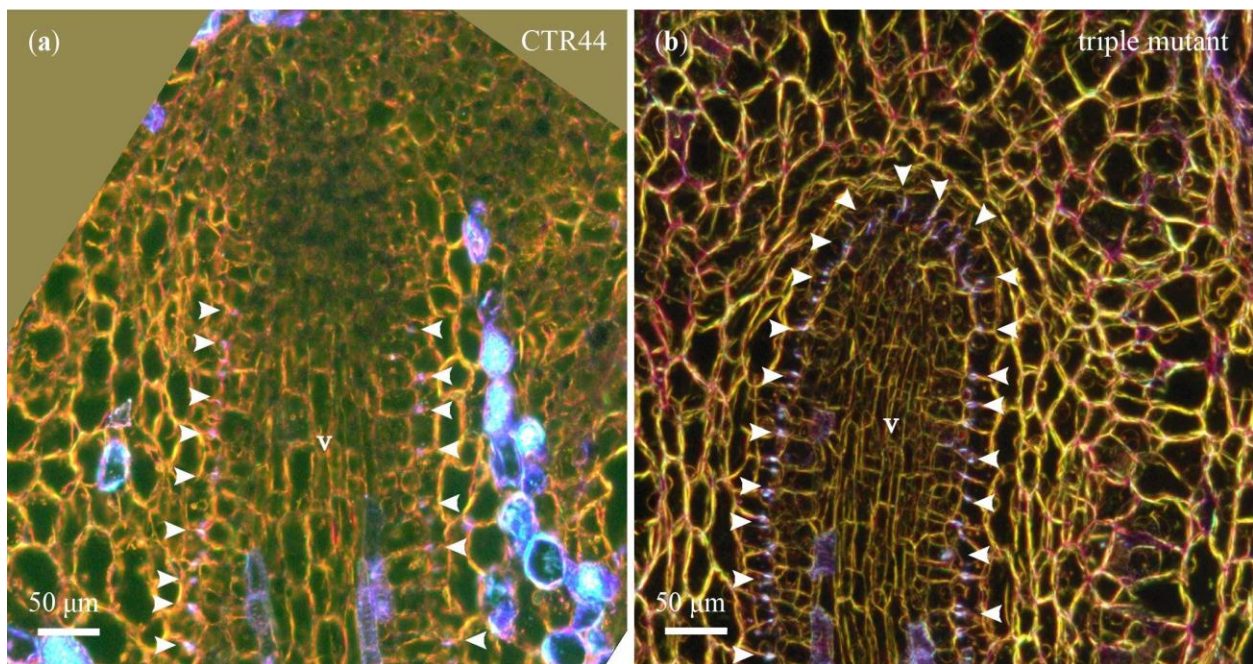

**Fig. S14** *Parasponia andersonii* *nf-ya1*, *nf-ya3*, *nf-ya6* and *Pannf-ya1*; *Pannf-ya3*; *Pannf-ya6* mutants can form arbuscular mycorrhiza.

Mycorrhization efficiency of *P. andersonii* wild type (WT), transgenic control line CTR44, and CRISPR-Cas9 knockout mutants *Pannf-ya1* (line 1), *Pannf-ya3* (line 11), *Pannf-ya6* (line 3) and *Pannf-ya1*; *Pannf-ya3*; *Pannf-ya6* triple mutant (line 11), 6 weeks post-inoculation with *Rhizophagus irregularis* DOAM197198 ( $n > 5$ ). Error bars denote standard errors.

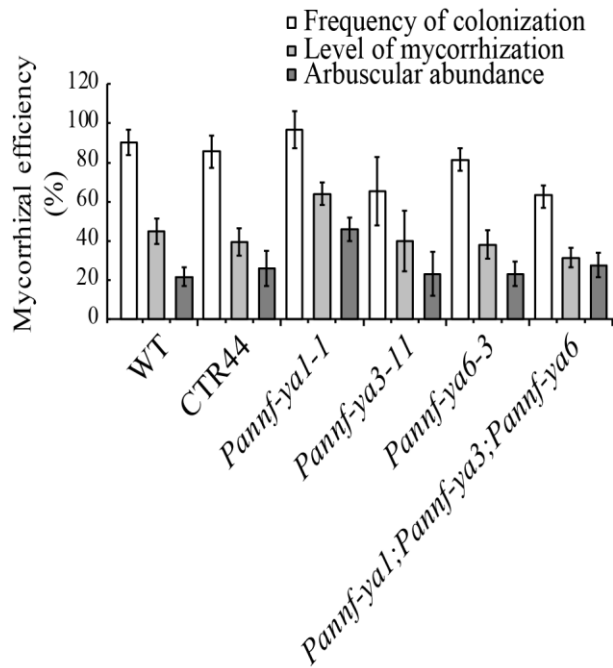

**Fig. S15: Putative NIN Binding sites in the *PanNF-YA1* promoter region.**

Shown is the annotated *PanNF-YA1* gene, including the putative promoter region (2,823 bp) and 5'UTR (977 bp containing an intron of 643 bp) that was used for *PanNF-YA1*<sub>pro</sub>:GUS reporter studies. A single putative NIN binding site with sequence TTAAC TTTTAGATGCTAGGTAGGGTTAATT 1,785 bp upstream of the transcriptional start site- is predicted based as the distinct consensus sequences as defined by Soyano et al. (2013) and Soyano et al. (2015).

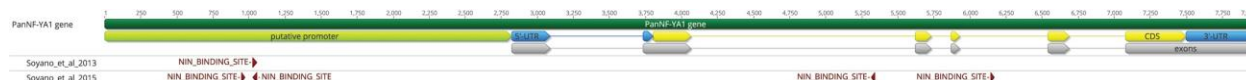



**Table S1:** Sequences of sgRNAs used for creating single, double and triple knockout mutants.

| sgRNA name       | Single mutant | Double mutant | Triple mutant | Location | Genomic target sequence |
|------------------|---------------|---------------|---------------|----------|-------------------------|
| PanNIN.1 sgRNA1  | Y             | -             | -             | exon 1   | GATGTTTTCGATGAGTGACCG   |
| PanNIN.1 sgRNA2  | Y             | -             | -             | exon 1   | ATGAGTTGTGATCAAGTGAG    |
| PanNIN.1 sgRNA3  | Y             | -             | -             | exon 1   | ATATGGGTGCCCATTAGAAG    |
| PanNF-YA1 sgRNA1 | Y             | -             | -             | exon 1   | CAGTTGTCCTCAATTCCACC    |
| PanNF-YA1 sgRNA2 | Y             | Y             | Y             | exon 1   | CCTTTGTCCATGGAACAACC    |
| PanNF-YA1 sgRNA3 | Y             | -             | -             | exon 1   | GACTTGTCCTAACACCATA     |
| PanNF-YA3 sgRNA1 | Y             | -             | -             | exon 1   | TGTAGTGTAGAAATCATGCC    |
| PanNF-YA3 sgRNA2 | Y             | Y             | Y             | exon 1   | CTGACCTGTAGATTGAGTTG    |
| PanNF-YA3 sgRNA3 | Y             | Y             | -             | exon 1   | CTTTCATACTAGCCACTTCA    |
| PanNF-YA6 sgRNA1 | Y             | -             | -             | exon 2   | TGTTGAAGATCAGATGAAGC    |
| PanNF-YA6 sgRNA2 | Y             | Y             | Y             | exon 2   | GAAGATGCAATGTCCTCTGA    |
| PanNF-YA6 sgRNA3 | Y             | -             | -             | exon 2   | TGGCTGCAGCTAACTTGTGA    |

**Table S2:** Primers used in this work.

| <b>Primer name</b>             | <b>Primer sequence</b>                                        | <b>Purpose</b>                          |
|--------------------------------|---------------------------------------------------------------|-----------------------------------------|
| sgRNA universal Reverse primer | TGTGGTCTCAAGCGTAATGCCAACTTTGTACG<br>TTTTAGAGCTAGAAATAGCAAG    | Cloning of<br>sgRNAs                    |
| PanNIN.1 sgRNA1 F              | TGTGGTCTCAATTGATGTTTCGATGAGTGACC<br>GGTTTTAGAGCTAGAAATAGCAAG  |                                         |
| PanNIN.1 sgRNA2 F              | TGTGGTCTCAATTGATGAGTTGTGATCAAGTG<br>AGGTTTTAGAGCTAGAAATAGCAAG |                                         |
| PanNIN.1 sgRNA3 F              | TGTGGTCTCAATTGATATGGGTGCCCATTAGA<br>AGGTTTTAGAGCTAGAAATAGCAAG |                                         |
| PanNF-YA1 sgRNA1 F             | TGTGGTCTCAATTGCAGTTGTCCTCAATTCCA<br>CCGTTTTAGAGCTAGAAATAGCAAG |                                         |
| PanNF-YA1 sgRNA2 F             | TGTGGTCTCAATTGCCTTTGTCCATGGAACAA<br>CCGTTTTAGAGCTAGAAATAGCAAG |                                         |
| PanNF-YA1 sgRNA3 F             | TGTGGTCTCAATTGACTTGTCCCTAACACCAT<br>AGTTTTAGAGCTAGAAATAGCAAG  |                                         |
| PanNF-YA3 sgRNA1 F             | TGTGGTCTCAATTGTGTAGTGTAGAAATCATG<br>CCGTTTTAGAGCTAGAAATAGCAAG |                                         |
| PanNF-YA3 sgRNA2 F             | TGTGGTCTCAATTGCTGACCTGTAGATTGAGT<br>TGGTTTTAGAGCTAGAAATAGCAAG |                                         |
| PanNF-YA3 sgRNA3 F             | TGTGGTCTCAATTGCTTTCATACTAGCCACTT<br>CAGTTTTAGAGCTAGAAATAGCAAG |                                         |
| PanNF-YA6 sgRNA1 F             | TGTGGTCTCAATTGTGTTGAAGATCAGATGA<br>AGCGTTTTAGAGCTAGAAATAGCAAG |                                         |
| PanNF-YA6 sgRNA2 F             | TGTGGTCTCAATTGAAGATGCAATGTCCTCTG<br>AGTTTTAGAGCTAGAAATAGCAAG  |                                         |
| PanNF-YA6 sgRNA3 F             | TGTGGTCTCAATTGTGGCTGCAGCTAACTTGT<br>GAGTTTTAGAGCTAGAAATAGCAAG |                                         |
| PanNIN.1 geno F                | CTCAACTTCACGCAACCTGC                                          | Genotyping<br>of CRISPR<br>mutant lines |
| PanNIN.1 geno R                | TCCCACGCTCAAAAATGGGA                                          |                                         |
| PanNF-YA1 geno F               | TCCCCCTATTTGGTCTTAGTCT                                        |                                         |
| PanNF-YA1 geno R               | TGCAAACAACAGAGTTATAGGCC                                       |                                         |
| PanNF-YA3 geno F               | CCAGCACAACATCATCAGAACA                                        |                                         |
| PanNF-YA3 geno R               | TTGTTAAGCAACGTAGGGAAC                                         |                                         |
| PanNF-YA6 geno F               | ATCTGGGTGGACAGGCAATG                                          |                                         |
| PanNF-YA6 geno R               | CTTACAAGAGCCCGTGGTCC                                          |                                         |
| PanEF1a qF                     | AGACAAGGTTAAGCGTGCAAG                                         | qRT-PCR                                 |
| PanEF1a qR                     | TGCAACTGGGCAACAACTC                                           |                                         |
| PanNIN qF                      | TGGGAATGGGACTTGTTTGG                                          |                                         |
| PanNIN qR                      | GGGAGGGCTGAAGTTTTGAA                                          |                                         |

|              |                        |  |
|--------------|------------------------|--|
| PanNF-YA1 qF | CAGTCATCCCTGCCAGAATATC |  |
| PanNF-YA1 qR | TGCAGTCAAGTTCAGCGG     |  |
| PanNF-YA3 qF | TCCCGCTATGATTCACCATTCC |  |
| PanNF-YA3 qR | ATTGCACGGTACTGCTTTGC   |  |
| PanNF-YA6 qF | CCATTCAATGGCTGGTGTGC   |  |
| PanNF-YA6 qR | TCCAAAGGCAATGGA ACTCG  |  |

**Table S3:** Putative promoter sequences used for promoter-reporter GUS assays.

In red: nucleotide mutations to remove BsaI and/or BpI restriction sites, which is essential for GoldenGate cloning; in blue: putative NIN binding site; underlined: 5'UTR; yellow highlighting: exon sequences in 5'UTR, in small letters: intron sequences; in bold: translational start site.

---

>*PanNF-YA1<sub>pro</sub>* (PanWU01x14\_284830)

ATCGAAGCCTCCAAAAGGGGGGCAGAGTTATTAAATGATGAAGAGAATTTTTAGGTCACCTTAA  
 GATGTGGAAATTAAGGTTTCGATGTAGCACAATGTAAGCATACATTATGTTAGTCATGATGTTA  
 GTCACTAATTACAAATAGTTGTACTTGTATTGGTCATATCAGTCGATCTATGCTATTACATTGA  
 ACATTTGACATAAAAATCCCAATATAATCCATATATTTAATGCTAAATTGACAAAATTATTACCA  
 ATATATATTCCTACTCTAATAGGTATTTTTTTTTTACCAATTTATGTGTATTCTTTTTAACCATT  
 GGATCATTATCTAAATATTATTATAATTTGGATAAGTGGAAAGAAAACAAAATAAATTAGGTA  
 AAACAATACGTATAAATAGATAAAAAAATGAGAAATTTAGGTGGATGACTAATATTTTATATT  
 TGATTAAGTAGATATCTATTTTTTAAATTTTATAGCTAAATATCTAGGTATATATATTTTTATA  
 CTTAGTAGATACATTAATTTACCAATTTTAGCTACTGTACTGAGATGTACTGGATATAAAATAT  
 TTTATATTTAGTATATAAAATTTTACACTTGATATATAAGTATATATACCGGTTTATTATAATA  
 TTTGATAAATAGATATTTACTTAAATTAGGCTTAAAATTTGATCCTGTTTCTATAAGCCCCAAA  
 AAAATACCTATTGAATCAGCGTCCATATATTTATATATATACAAATGACCAAAAAAAAAAAAAA  
 CAATTAGAACATGAACTACTAATGTTTATTGGCCAGAACCAAGAAAGTTGCAACACTTTTGTA  
 TAGGAATAATCTGGTTACAAGGTCGTCAGATTCCTATTTACATACTTTAATAAATGCATTTCCA  
 CCAAAAAAAAAATAAGAAAACAAAAGCTCATTCCAATCTCAGCTAGTCTCTCTGCCCTTCTCAA  
 TGACTAAGGGTCAGGACACTTTCACGAAATATAAGCTTTAGTTTTGGGGTTTACTTCATATAAA  
**GTTAACTTTTAGATGCTAGGTAGGGTTAAT**TACAAAGATTAAAAAAATGACAATTATAAGTGGA  
 AATGACCGTGACAGTGATAAATATCAACACCATTAATTATATATAACAATTGCTAAGCTAATCA  
 GAACTTTTCACGCATATAAAATACAATATCTCATCCCAATTAAGATTTTTATATTTGAAATG  
 TGACATAATAGTAACATGTTTTTTTTGGTTCGTATACATTTATATATATGGTTCCTAGTAGGGAT  
 TTTTTTTAACTTATCTATAACTATTTTTATTTTTTAGTCATTAGATGATGATCTAACGATTATTA  
 TAATTTGAGTAGTTAAAAAATAATATAAATGAATACTCATTATTCAATTCTTTTCTCTTTCT  
 ATCTTTAAAACATGTGTGATGATTTTTAATTAGGAAAAATAACTTATGTATAGGTAAAAAAA  
 AATACCTACTAAATATATATATATATATTTGAACACTAATCCAGTAGGTTTTTTTTTTTTTACC  
 TATTTATAGGTATTCCTTTGTCCAATAAAAATTCATCACACGTATTTTTTATGATAAAAAAAA  
 AGAGAGAAAAAATTATTAATAATAAGTTTTTATTTTTTTATTTTTTTTTATTTTTTGATTGATA  
 ACCTATTTATATATTTTCCCACTACGGCTGCTAATTAGCAACAGCCATAATCTTGACTGTCAT  
 TAAGTATCTTTAGCCATTAGAATTATGGTTCATATATATCTTCAAGCTGTTAATTTGCACCACCG  
 AATGAATATTATAGTAATATCATTTAAGCTGAAAATATTACTATACTATGTTGGAGCATTTGCC  
 AACTCAATTTTTTCCCACTACTTCACTTGAGTGAAAGGGTAAATTTTTAAGTGATACTGATCCG  
 GCCTCTATGAATATGTTAGCTAATTATACTAAGGTAATAATAGGAACTAAAGATTGATATCAAT  
 GGTTATAAATATTGTTTGGAAATGTTTATGTACACATCACTGAAAAAATTTCTGAAATTTGTTTT  
 TCTAACACGTTTGTGTTTCATGAGGAATAAAAAAATTAACATTAACAAAAAAGGACACTAA  
 GCTGTTTTAATTTTTAAAACCGGAAAAAATAAATTTATGGTATATATATAACAACCTAATCCCA  
 CATGCCCTGACACTCCTTTTTATTTATTTATTTTTTCAAGAACGAAAAAAGAATTTTGAGTAG  
 TAGGAGAAAAGTCTATTTTCTGACAGTTATATAATGTTTAAAATTAACAATACTCAAGTATAT  
 AAAATAACAAAGCAGTTTAAGGATTATAAATCTATTTATATAAATAGTATTAATAAATGGAAAT

GAAAACACTATGACATCCCATCGGACCATGGACATGCCCTGGAATTAGAGAACCAAAGGCCAAAAAC  
CATGCACTCCACAACCTCCTAAGCAAAAATTTTAAACCTTATCCGCATTATTTTCTTAAACTTATC  
TGGAACCCACTTGTATTATATACATATAATAAACAATACGAATTTTACATTACATACATATATA  
TATTATATATATATATATATGGCAGGCTTTTGTATATTATATATAGTAATGAATAATCCAGTTT  
TTTTTTTCCCCTGTGACATTCCAACACCCCAAGTTGTGAAGCTTAAGAAAAATATTAAGAGAA  
AGGGGTACCTCAACTTTAGCTTAATTTGATAAAAAATAAACATAAATAAGAATTGATCAAAATAT  
GTTGGAGAAAAACGGTGAACCCGAGAGAGAAAGGGAGCACTAAATTCTTTTGTTTTATTTATTT  
TTTTAAAAAATATATATATACATATTATATAATTTGATCTGTAACACTATACATATTGGCACA  
TACAATACAAAGAGGGGTACTTGCATGAAAGGCCAAAGCTTATTGGCCATTGGCGTCTAGTTCCA  
TTAGAATTGTACGCATTTATCATTAGGGGGTCTCTCTCTCTCTCTCTCTCTCTCTCTCTCTCTCT  
CTCTCTCTCTCTCTGTTCTTGAGCGTTGGACACGAAGCAAACCTGTTGCTGGGTACTGCTATTCA  
GCTAGTTTTCTCTCATATgtgagctctcaaataccaaacctttttctattcttagccttggtgc  
tccaacatagttggagggcttctgtcaaagtttcttttttcttttaagcttgaattttttct  
cccttctcatttttgatttctgggtttttttttgttctgagttgatgcttttgttctttttt  
ttttcccttcttttttaaatgtatctgtcagttaaagaagatgtaatttcagtgatcaaacag  
acagaacagaattgtttgtaaccaatatttgatcaaaataaattttgagagctcattcacaatt  
ttcatttttttttcttcaatgaaacaccgtggtttcatctttttattgtttcatttatatcg  
acaatttatttttttataatctcgaatcaaatcaattttgatcacttattatccttctgat  
gagctctgtaaatcagaccagaatttttttttttgggcaaattttagttcaatattgaaactc  
aatgaaatttatttccccctattttgggtcttagtctttgtcaactatagatattttgtcatatt  
tttcaatctcgtgttacatagaatgttgtagatagatagcttatagactcataattaagggtg  
gtgggttttcatatttgtagGCGTTAGATTCAACAATTGGTTTGAAGCTAGCTAGGTACTGTGG  
TTTTGATCATTTTGCAAGTTAGCTATG

>PanNF-YA3<sub>pro</sub> (PanWU01x14\_246880)

CATAACGAAGAACTCTTGGAGTAATTAGAAGGTTGGTGGTGGATGATGGGTTGCTTTCAAATT  
TTGTATTTTTATTTTTTAAATGCGACTTTCAGGTCATTTTATATTGACAGCAGATAAATGACA  
TTGATTATATAAAGTAAGCTAGCTAATTCAGGGCTCTTTTGTAAATAAATGCTGTGTAGAGGGTC  
ATTAATTTAAAAGCTGCCATATTATCTTCCATTAATTGCATTAATAAGTTTTATTTAATTAAT  
TGAAATCCATGACAAAGATGGATATCTAGCTACCTTCACTCTCTTGGAGCGCGTGTGGAAAGTC  
GTAAGAGAATATTAGAATTAGATTTAGAAGTACATGAGAATTCTTGGAAAGCTCCTCATCCTCAT  
TCCAGAGTAATGGGGACATGATTCAACTTCTTACATGTTATCCAAAAGCATCACACAAAAAAT  
TCAGTTGGTAAATTTAATTTTTTAAATTTGATCATGAGTTTATTCTAAAAACAAATTAATGCAA  
AAAAAAAATTTCTTATGTCTAGATTTTCTGTAATTTAAATATTAATTTTGGAACTGTCAAA  
AAAATATATTTGTATTTTAAAATTTTAAACATTTGTATCCTCTATTCTTATTTTGTAGTTCAA  
CAATATTGTTTTTTTGTAAATATTTTAAATTTTTTAAAAATAGAAATAACATAGTTTGGATTTGT  
AATTTTTTGGAGAAATAAATTTATCAAAATATGGGCATAGGATACAAATTTTTTTTACGAATTTT  
AAAATGTAGACATTTTTTTTGGGTAGAAATTTAGGATTTAAACCGCATAAGGACTACTAGATTT  
CTTGGAAATTTTTTGCAGTTAACCCTAAAAAATGACCATGAGTTGATTACTAATTTAGACCACT  
AATATTTCTTTTTCTTAAAGATAATAGTTGCATTTAGGGTAAAATCTTGTATTTGAAATGAAATG  
CATTTTTTTTGTGTTAAGAAATAGACTAAGATAATATGTGGTGTGAATACCCTATAATTATA  
TGGTCTTTAATATATTCTTTTGTAAATTCATTTGCAAGCTGTAATGCTTTCTACC  
TATATCAAAAAAATTAATAAGAGATAATTTATAACCTTTAATTTATTTTCATGTAAGCGATTAA  
ATTTCTCTTAGCCTTATCATTTCTGAATTATTCAAATGAATCTAATTAACCTATAGGTCTTATT  
ATTAGAAAAGTTTATATAATAGAAAAACATAAAGGGTTTTTACTAAACGTAAAGTTAAAAT  
AATAACTTCAAAAAAATAAATTTACCTTAAAACAAATTAATAAAGAAAAAGAAAAAAGAAA  
ACAGGGGAGATAGTTGATTGATTTCAATGGGCCCTTGTAGCGCGTGGGTAGAACACTGGCCGTA





ggtttgcttatttatttgtggggttcatagttgatttcttaagcgatctgctagtttgagct  
tttctggtgatttggacataactgcatgtaatggtatctttcttgcccactgaaccataggt  
cttttacttgtaatctggggttctgttaggtactttttgagaaaataatcaacaattttggaa  
aaaattttgtaccctttaagttttacatcttgatgtgtgcctttaagtagtagctttgtgatg  
tttgtatggtacatgtggttgtttgggtatgtcactgaattttgtacgcagcaagttttggagt  
caattattgtgcttgtgggatttcttggttagtctgctttcttgctggactagtgcttatgaaa  
caatggcaggttacctaactgttattgaaagagctagaataggaaatgtttaaggaaacaaa  
aaggagaattatgaaaaggaatgcttgatatctattttagctgtttattaatacttattatgtg  
taggactcacataatctctttgctaaatttgtaagtaaggacattaatgaataaaggaaggaaa  
tactcccttctattctctttccatttattacacggaaacatggtatagatatgatagattttt  
ttaaatcaattttaactctcaattgggacatgctgtactctgtgcatggtagtacgcgtatg  
cttacatacatacatacatgcatacatacactatcttggttggaactataaaaatacattc  
tctcttaagatatggagacagaaatagctcattttatggtatcttccaattttggacttttatt  
atattcctggtatttttatcttggggattgattggttatattgactagattactctttgctatt  
gaaacttgccaacaaaagtgtcattccgagataattaagtttagcaccttttttaccattaatt  
tccctcaaatttcaGCAAATTCAGACTAAATGTAAGCTTCATAGTGGAAGTTCAACTGGATCT  
TCATCAACGCGTTACTAAGCATTTAGGGTTTCAAATTTGGAGTACTTTAGAAGGAAACATCTAC  
AACACGAGCAATTGGTCAATCTCAAGAAAATTTGTGGTTTGGGAGGGACCAATAAAAAGATCC  
**ATG**



**Table S4:** Gene identifiers for NF-YA proteins used to build the phylogenetic tree depicted in Figure 4 and Figure S7.

| <b>Name</b>   | <b>Gene Identifier</b>  |
|---------------|-------------------------|
| AtNF-YA1      | AT5G12840               |
| AtNF-YA2      | AT3G05690               |
| AtNF-YA3      | AT1G72830               |
| AtNF-YA4      | AT2G34720               |
| AtNF-YA5      | AT1G54160               |
| AtNF-YA6      | AT3G14020               |
| AtNF-YA7      | AT1G30500               |
| AtNF-YA8      | AT1G17590               |
| AtNF-YA9      | AT3G20910               |
| AtNF-YA10     | AT5G06510               |
| Fve_mrna07522 | mrna07522.1-v1.0-hybrid |
| Fve_mrna12709 | mrna12709.1-v1.0-hybrid |
| Fve_mrna14681 | mrna14681.1-v1.0-hybrid |
| Fve_mrna18295 | mrna18295.1-v1.0-hybrid |
| Fve_mrna26819 | mrna26819.1-v1.0-hybrid |
| Fve_mrna28941 | mrna28941.1-v1.0-hybrid |
| Gma_02G195000 | Glyma.02G195000         |
| Gma_02G303800 | Glyma.02G303800         |
| Gma_03G203000 | Glyma.03G203000         |
| Gma_05G166100 | Glyma.05G166100         |
| Gma_07G036200 | Glyma.07G036200         |
| Gma_08G124200 | Glyma.08G124200         |
| Gma_08G335900 | Glyma.08G335900         |
| Gma_09G023800 | Glyma.09G023800         |
| Gma_09G068400 | Glyma.09G068400         |
| Gma_10G082800 | Glyma.10G082800         |
| Gma_12G236800 | Glyma.12G236800         |
| Gma_13G107900 | Glyma.13G107900         |
| Gma_13G202300 | Glyma.13G202300         |
| Gma_14G010000 | Glyma.14G010000         |
| Gma_15G027400 | Glyma.15G027400         |
| Gma_15G129900 | Glyma.15G129900         |
| Gma_15G173300 | Glyma.15G173300         |
| Gma_16G005500 | Glyma.16G005500         |
| Gma_17G051400 | Glyma.17G051400         |
| Gma_18G071000 | Glyma.18G071000         |
| Gma_19G200800 | Glyma.19G200800         |
| Lj_FS318732   | FS318732.1              |
| LjNF-YA1      | Lj5g3v0841080           |
| LjNF-YA2      | Lj6g3v0647470           |

|              |                   |
|--------------|-------------------|
| LjNF-YA3     | Lj4g3v2179250     |
| LjNF-YA4     | Lj1g3v4752710     |
| LjNF-YA5     | Lj3g3v2657800     |
| LjNF-YA6     | Lj3g3v0338970     |
| LjNF-YA7     | Lj2g3v3336090     |
| LjNF-YA8     | Lj0g3v0252369     |
| MnoNF-YA1    | XP_010102352.1    |
| MnoNF-YA3    | XP_010087689.1    |
| MnoNF-YA7    | XP_010098569.1    |
| MnoNF-YA8    | XP_010090113.1    |
| MnoNF-YA9a   | XP_010105454.1    |
| MnoNF-YA10   | XP_010106984.1    |
| MnoNF-YA9b   | XP_010088228.1    |
| MtNF-YA1     | Medtr1g056530     |
| MtNF-YA2     | Medtr7g106450     |
| MtNF-YA3     | Medtr2g041090     |
| MtNF-YA4     | Medtr2g099490     |
| MtNF-YA5     | Medtr3g061510     |
| MtNF-YA6     | Medtr2g030170     |
| MtNF-YA7     | Medtr8g037270     |
| MtNF-YA8     | Medtr8g019540     |
| PanNF-YA1    | PanWU01x14_284830 |
| PanNF-YA2    | PanWU01x14_161830 |
| PanNF-YA3    | PanWU01x14_246880 |
| PanNF-YA4    | PanWU01x14_050420 |
| PanNF-YA5    | PanWU01x14_192760 |
| PanNF-YA6    | PanWU01x14_192330 |
| PanNF-YA7    | PanWU01x14_231390 |
| Ppe_2G014500 | Prupe.2G014500    |
| Ppe_3G043900 | Prupe.3G043900    |
| Ppe_4G090200 | Prupe.4G090200    |
| Ppe_4G249900 | Prupe.4G249900    |
| Ppe_7G093100 | Prupe.7G093100    |
| Ppe_7G203500 | Prupe.7G203500    |
| PvNF-YA1     | Phvul.001G196800  |
| PvNF-YA2     | Phvul.002G246600  |
| PvNF-YA3     | Phvul.005G156100  |
| PvNF-YA4     | Phvul.003G133100  |
| PvNF-YA5     | Phvul.008G283100  |
| PvNF-YA6     | Phvul.011G211300  |
| PvNF-YA7     | Phvul.006G062200  |
| PvNF-YA8     | Phvul.010G133300  |
| PvNF-YA9     | Phvul.007G267100  |
| TorNF-YA1    | TorRG33x02_341480 |
| TorNF-YA2    | TorRG33x02_150260 |

|               |                   |
|---------------|-------------------|
| TorNF-YA3     | TorRG33x02_081410 |
| TorNF-YA4     | TorRG33x02_339730 |
| TorNF-YA5     | TorRG33x02_031550 |
| TorNF-YA6     | TorRG33x02_321500 |
| TorNF-YA7     | TorRG33x02_125390 |
| AduNF-YA1     | XP_015951283      |
| AduNF-YA2     | XP_015946278      |
| AduNF-YA3     | XP_015954718.1    |
| AduNF-YA4     | Aradu.67X2R       |
| AduNF-YA5     | XP_015972671.1    |
| AduNF-YA6     | XP_015956129.1    |
| AduNF-YA7     | XP_015937254.1    |
| AduNF-YA8     | XP_015935517.1    |
| AduNF-YA9     | XP_015959290.1    |
| Dgl3616S29258 | Dgl3616S29258     |
| Dgl216S24617  | Dgl216S24617      |
| Dgl81S35216   | Dgl81S35216       |
| Dgl959S36562  | Dgl959S36562      |
| Dgl402S29919  | Dgl402S29919      |
| Dgl544S31934  | Dgl544S31934      |
| Dgl749S12860  | Dgl749S12860      |
| Cgl33S15932   | Cgl33S15932       |
| Cgl26S24714   | Cgl26S24714       |
| Cgl31S04874   | Cgl31S04874       |
| Cgl428S01957  | Cgl428S01957      |
| Cgl231S11946  | Cgl231S11946      |
| Cgl8S22241    | Cgl8S22241        |
| Cgl24S00922   | Cgl24S00922       |

## REFERENCES

**van Velzen R, Holmer R, Bu F, Rutten L, van Zeijl A, Liu W, Santuari L, Cao Q, Sharma T, Shen D, *et al.* 2018.** Comparative genomics of the nonlegume *Parasponia* reveals insights into evolution of nitrogen-fixing rhizobium symbioses. *Proceedings of the National Academy of Sciences of the United States of America* **115**: E4700–E4709.

**Soyano T, Kouchi H, Hirota A, Hayashi M. 2013.** Nodule inception directly targets NF-Y subunit genes to regulate essential processes of root nodule development in *Lotus japonicus*. *PLoS genetics* **9**: e1003352.

**Soyano T, Shimoda Y, Hayashi M. 2015.** NODULE INCEPTION antagonistically regulates gene expression with nitrate in *Lotus japonicus*. *Plant & cell physiology* **56**: 368–376.
